# Supplementary material for: The genetic relationships between brain structure and schizophrenia
Source: PubMed Central journal article supplement (PMC10684873; doi:10.1038/s41467-023-43567-7), 2023-11-28
Supplement: 41467_2023_43567_MOESM4_ESM.pdf [file 41467_2023_43567_MOESM4_ESM.pdf]

## Reporting Summary

Nature Portfolio wishes to improve the reproducibility of the work that we publish. This form provides structure for consistency and transparency in reporting. For further information on Nature Portfolio policies, see our [Editorial Policies](#) and the [Editorial Policy Checklist](#).

### Statistics

For all statistical analyses, confirm that the following items are present in the figure legend, table legend, main text, or Methods section.

- | n/a                      | Confirmed                                                                                                                                                                                                                                                                                      |
|--------------------------|------------------------------------------------------------------------------------------------------------------------------------------------------------------------------------------------------------------------------------------------------------------------------------------------|
| <input type="checkbox"/> | <input checked="" type="checkbox"/> The exact sample size ( $n$ ) for each experimental group/condition, given as a discrete number and unit of measurement                                                                                                                                    |
| <input type="checkbox"/> | <input checked="" type="checkbox"/> A statement on whether measurements were taken from distinct samples or whether the same sample was measured repeatedly                                                                                                                                    |
| <input type="checkbox"/> | <input checked="" type="checkbox"/> The statistical test(s) used AND whether they are one- or two-sided<br><i>Only common tests should be described solely by name; describe more complex techniques in the Methods section.</i>                                                               |
| <input type="checkbox"/> | <input checked="" type="checkbox"/> A description of all covariates tested                                                                                                                                                                                                                     |
| <input type="checkbox"/> | <input checked="" type="checkbox"/> A description of any assumptions or corrections, such as tests of normality and adjustment for multiple comparisons                                                                                                                                        |
| <input type="checkbox"/> | <input checked="" type="checkbox"/> A full description of the statistical parameters including central tendency (e.g. means) or other basic estimates (e.g. regression coefficient) AND variation (e.g. standard deviation) or associated estimates of uncertainty (e.g. confidence intervals) |
| <input type="checkbox"/> | <input checked="" type="checkbox"/> For null hypothesis testing, the test statistic (e.g. $F$ , $t$ , $r$ ) with confidence intervals, effect sizes, degrees of freedom and $P$ value noted<br><i>Give <math>P</math> values as exact values whenever suitable.</i>                            |
| <input type="checkbox"/> | <input checked="" type="checkbox"/> For Bayesian analysis, information on the choice of priors and Markov chain Monte Carlo settings                                                                                                                                                           |
| <input type="checkbox"/> | <input checked="" type="checkbox"/> For hierarchical and complex designs, identification of the appropriate level for tests and full reporting of outcomes                                                                                                                                     |
| <input type="checkbox"/> | <input checked="" type="checkbox"/> Estimates of effect sizes (e.g. Cohen's $d$ , Pearson's $r$ ), indicating how they were calculated                                                                                                                                                         |

*Our web collection on [statistics for biologists](#) contains articles on many of the points above.*

### Software and code

Policy information about [availability of computer code](#)

- |                 |                                                                                                                                                                                                                                                                                                                                                                                                                                                                                                                                                                                                                                                                                                                                                                                                                                                                                                                                                                                                                         |
|-----------------|-------------------------------------------------------------------------------------------------------------------------------------------------------------------------------------------------------------------------------------------------------------------------------------------------------------------------------------------------------------------------------------------------------------------------------------------------------------------------------------------------------------------------------------------------------------------------------------------------------------------------------------------------------------------------------------------------------------------------------------------------------------------------------------------------------------------------------------------------------------------------------------------------------------------------------------------------------------------------------------------------------------------------|
| Data collection | MRI data for this project came from the UK Biobank. GWAS summary data were generated by other researchers. This project was based on secondary data.                                                                                                                                                                                                                                                                                                                                                                                                                                                                                                                                                                                                                                                                                                                                                                                                                                                                    |
| Data analysis   | Statistical analysis was performed using R version 3.5.2. Code is available on Github: <a href="https://github.com/evastauffer/schizophrenia-and-brain-structure">https://github.com/evastauffer/schizophrenia-and-brain-structure</a> ; Software used included: Plink version 1.9 <a href="https://zzz.bwh.harvard.edu/plink/plink2.shtml">https://zzz.bwh.harvard.edu/plink/plink2.shtml</a> ; twosampleMR' package v0.5.6 <a href="https://mrcieu.github.io/TwoSampleMR/articles/introduction.html">https://mrcieu.github.io/TwoSampleMR/articles/introduction.html</a> ; LAVA <a href="https://github.com/josefin-werme/LAVA">https://github.com/josefin-werme/LAVA</a> ; FUMA version 1.6.0 <a href="https://fuma.ctglab.nl/">https://fuma.ctglab.nl/</a> ; H-MAGMA <a href="https://github.com/thewonlab/H-MAGMA">https://github.com/thewonlab/H-MAGMA</a> ; gProfiler2 <a href="https://cran.r-project.org/web/packages/gprofiler2/index.html">https://cran.r-project.org/web/packages/gprofiler2/index.html</a> |

For manuscripts utilizing custom algorithms or software that are central to the research but not yet described in published literature, software must be made available to editors and reviewers. We strongly encourage code deposition in a community repository (e.g. GitHub). See the Nature Portfolio [guidelines for submitting code & software](#) for further information.

## Data

Policy information about [availability of data](#)

All manuscripts must include a [data availability statement](#). This statement should provide the following information, where applicable:

- Accession codes, unique identifiers, or web links for publicly available datasets
- A description of any restrictions on data availability
- For clinical datasets or third party data, please ensure that the statement adheres to our [policy](#)

Data used in this project are available as outlined below. Summary statistics of cortical MRI phenotypes are available for download from <https://portal.idc-cam.org.uk/overview/483>. Summary statistics for schizophrenia, bipolar disorder and Alzheimer's disease can be accessed from the Psychiatric Genomics Consortium <https://pgc.unc.edu/for-researchers/download-results/>. Height GWAS results are available at <https://www.nature.com/articles/s41586-022-05275-y>. MRI Data from the UKB can be applied for and accessed by approved researchers <https://www.ukbiobank.ac.uk/>. Spatiotemporal gene expression data can be accessed from PsychENCODE under [http://development.psychencode.org/files/processed\\_data/RNA-seq/mRNA-seq\\_hg38.gencode21.wholeGene.geneComposite.STAR.nochrM.gene.count.txt](http://development.psychencode.org/files/processed_data/RNA-seq/mRNA-seq_hg38.gencode21.wholeGene.geneComposite.STAR.nochrM.gene.count.txt). Cell type specific expression data can be downloaded from <http://solo.bmap.ucla.edu/shiny/webapp/>. Information on constrained genes can be accessed from gnomAD <https://gnomad.broadinstitute.org/downloads#v2-constraint>. Gene sets for positional enrichments (MSigDB C1, version MSigDB 2023.2.Hs) can be found at [https://www.gsea-msigdb.org/gsea/msigdb/human/collection\\_details.jsp#C1](https://www.gsea-msigdb.org/gsea/msigdb/human/collection_details.jsp#C1). Source data are provided with this paper.

## Research involving human participants, their data, or biological material

Policy information about studies with [human participants or human data](#). See also policy information about [sex, gender \(identity/presentation\), and sexual orientation](#) and [race, ethnicity and racism](#).

|                                                                    |                                                                                                                                                                                                                                                                                                                                                                                                                                                                                                                   |
|--------------------------------------------------------------------|-------------------------------------------------------------------------------------------------------------------------------------------------------------------------------------------------------------------------------------------------------------------------------------------------------------------------------------------------------------------------------------------------------------------------------------------------------------------------------------------------------------------|
| Reporting on sex and gender                                        | We use the term sex throughout, and in our study this refers to genetic sex, determined by the composition of sex chromosomes.                                                                                                                                                                                                                                                                                                                                                                                    |
| Reporting on race, ethnicity, or other socially relevant groupings | We restricted our analyses to individuals of predominantly European ancestry as inferred by genetic principal components. This is also referred to as genetically referred ancestry.                                                                                                                                                                                                                                                                                                                              |
| Population characteristics                                         | The MRI sample were based on subjects of the UK Biobank. The UK Biobank is a population-based prospective cohort of 500,000 individuals from the UK, aged between 39 and 73 years. Approximately 40,000 scans have been completed when the current study commenced.                                                                                                                                                                                                                                               |
| Recruitment                                                        | Participants from the UK Biobank were recruited by other researchers. Details of how participants were recruited are provided in papers references in the Methods section.                                                                                                                                                                                                                                                                                                                                        |
| Ethics oversight                                                   | Ethical procedures for the UK Biobank are controlled by the Ethics and Guidance council ( <a href="http://www.ukbiobank.ac.uk/ethics">http://www.ukbiobank.ac.uk/ethics</a> ), and the study was conducted in accordance with the UK Biobank Ethics and Governance Framework document ( <a href="https://www.ukbiobank.ac.uk/media/Oxsbmfmw/egf.pdf">https://www.ukbiobank.ac.uk/media/Oxsbmfmw/egf.pdf</a> ), with institutional review board approval by the North West Multi-center Research Ethics Committee. |

Note that full information on the approval of the study protocol must also be provided in the manuscript.

## Field-specific reporting

Please select the one below that is the best fit for your research. If you are not sure, read the appropriate sections before making your selection.

- Life sciences       Behavioural & social sciences       Ecological, evolutionary & environmental sciences

For a reference copy of the document with all sections, see [nature.com/documents/nr-reporting-summary-flat.pdf](https://nature.com/documents/nr-reporting-summary-flat.pdf)

## Life sciences study design

All studies must disclose on these points even when the disclosure is negative.

|                 |                                                                                                                                                                                                                                                                                                                                                                                                                                                                                          |
|-----------------|------------------------------------------------------------------------------------------------------------------------------------------------------------------------------------------------------------------------------------------------------------------------------------------------------------------------------------------------------------------------------------------------------------------------------------------------------------------------------------------|
| Sample size     | We focused on a subset of N = 40,680 participants for each of whom complete genotype and multimodal MRI data were available for download (February 2020). We excluded participants with incomplete MRI data and we additionally excluded participants who were robustly defined as outliers by global or regional metrics more than 5 times the median absolute deviation from the sample median ( $\pm 5$ MAD). For CT and SA this lead to 31,780 subjects and 31,797 subjects for NDI. |
| Data exclusions | We excluded participants with incomplete MRI data and we additionally excluded participants who were robustly defined as outliers by global or regional metrics more than 5 times the median absolute deviation from the sample median ( $\pm 5$ MAD). For CT and SA this lead to 31,780 subjects and 31,797 subjects for NDI.                                                                                                                                                           |
| Replication     | We replicated the genetic intersection between schizophrenia and both surface area and cortical thickness on chromosome 17q21.31 using previously published lists of high confidence genes by other researchers.                                                                                                                                                                                                                                                                         |

Randomization Blinding 

## Reporting for specific materials, systems and methods

We require information from authors about some types of materials, experimental systems and methods used in many studies. Here, indicate whether each material, system or method listed is relevant to your study. If you are not sure if a list item applies to your research, read the appropriate section before selecting a response.

### Materials & experimental systems

| n/a                                 | Involvement                                            |
|-------------------------------------|--------------------------------------------------------|
| <input checked="" type="checkbox"/> | <input type="checkbox"/> Antibodies                    |
| <input checked="" type="checkbox"/> | <input type="checkbox"/> Eukaryotic cell lines         |
| <input checked="" type="checkbox"/> | <input type="checkbox"/> Palaeontology and archaeology |
| <input checked="" type="checkbox"/> | <input type="checkbox"/> Animals and other organisms   |
| <input checked="" type="checkbox"/> | <input type="checkbox"/> Clinical data                 |
| <input checked="" type="checkbox"/> | <input type="checkbox"/> Dual use research of concern  |
| <input checked="" type="checkbox"/> | <input type="checkbox"/> Plants                        |

### Methods

| n/a                                 | Involvement                                     |
|-------------------------------------|-------------------------------------------------|
| <input checked="" type="checkbox"/> | <input type="checkbox"/> ChIP-seq               |
| <input checked="" type="checkbox"/> | <input type="checkbox"/> Flow cytometry         |
| <input checked="" type="checkbox"/> | <input type="checkbox"/> MRI-based neuroimaging |

## Plants

Seed stocks

Report on the source of all seed stocks or other plant material used. If applicable, state the seed stock centre and catalogue number. If plant specimens were collected from the field, describe the collection location, date and sampling procedures.

Novel plant genotypes

Describe the methods by which all novel plant genotypes were produced. This includes those generated by transgenic approaches, gene editing, chemical/radiation-based mutagenesis and hybridization. For transgenic lines, describe the transformation method, the number of independent lines analyzed and the generation upon which experiments were performed. For gene-edited lines, describe the editor used, the endogenous sequence targeted for editing, the targeting guide RNA sequence (if applicable) and how the editor was applied.

Authentication

Describe any authentication procedures for each seed stock used or novel genotype generated. Describe any experiments used to assess the effect of a mutation and, where applicable, how potential secondary effects (e.g. second site T-DNA insertions, mosaicism, off-target gene editing) were examined.
